# Supplementary material for: Development, Validation, and Utilization of a Social Media Use and Mental Health Questionnaire among Middle Eastern and Western Adults: A Pilot Study from the UAE
Source: MDPI journal article supplement (doi:10.3390/ijerph192316063), 2022-11-30
Supplement: s1 [file s1]

| Item                                                                                                                                                  | Strongly disagree<br>N (%) | Disagree<br>N (%) | Neutral N<br>(%) | Agree N<br>(%) | Strongly<br>Agree N<br>(%) | Mean $\pm$ SD   |
|-------------------------------------------------------------------------------------------------------------------------------------------------------|----------------------------|-------------------|------------------|----------------|----------------------------|-----------------|
| 1. Mental illness is a state of mind and not a physical condition                                                                                     | 163 (16.3)                 | 204 (20.4)        | 190 (19)         | 270 (27)       | 174 (17.4)                 | 3.09 $\pm$ 1.35 |
| 2. People with mental illness cannot take care of themselves and must be hospitalized                                                                 | 206 (20.6)                 | 311 (31.1)        | 287 (28.7)       | 147 (14.7)     | 50 (5.0)                   | 2.52 $\pm$ 1.12 |
| 3. There is something about mentally ill people's behavior online that makes it easy to tell them from ordinary people                                | 171 (17.1)                 | 267 (26.7)        | 242 (24.2)       | 231 (23.1)     | 90 (9.0)                   | 2.80 $\pm$ 1.23 |
| 4. People who develop signs of mental disorders should be limited from using social media or outright forbidden                                       | 255 (25.5)                 | 314 (31.4)        | 218 (21.8)       | 157 (15.7)     | 57 (5.7)                   | 2.45 $\pm$ 1.19 |
| 5. Mentally ill people are hostile or aggressive                                                                                                      | 187 (18.7)                 | 374 (37.4)        | 314 (31.4)       | 105 (10.5)     | 21 (2.1)                   | 2.40 $\pm$ 0.97 |
| 6. Anyone with a history of mental disorders should be excluded from having any role with authority over others (e.g., admins) in an online community | 276 (27.6)                 | 323 (32.3)        | 209 (20.9)       | 150 (15)       | 43 (4.3)                   | 2.36 $\pm$ 1.16 |
| 7. People develop mental disorders due to heavier, emotional interactions with online communities and social media                                    | 74 (7.4)                   | 204 (20.4)        | 348 (34.8)       | 295 (29.5)     | 80 (8)                     | 3.10 $\pm$ 1.05 |
| 8. Mental disorders are health conditions like any other                                                                                              | 25 (2.5)                   | 69 (6.9)          | 109 (10.9)       | 346 (34.6)     | 452 (45.2)                 | 4.13 $\pm$ 1.02 |
| 9. I would continue being an online friend to someone after discovering their mental disorder                                                         | 11 (1.1)                   | 32 (3.2)          | 131 (13.1)       | 445 (44.5)     | 382 (38.2)                 | 4.15 $\pm$ 0.85 |
| 10. I would be willing to engage in a relationship with                                                                                               | 18 (1.8)                   | 77 (7.7)          | 220 (22)         | 407 (40.7)     | 279 (27.9)                 | 3.85 $\pm$ 0.97 |

someone that has a controlled  
mental disorder

|                                                                                                         |            |            |            |            |            |             |
|---------------------------------------------------------------------------------------------------------|------------|------------|------------|------------|------------|-------------|
| 11. Mentally ill people can live normally within a community                                            | 11 (1.1)   | 58 (5.8)   | 162 (16.2) | 432 (43.2) | 338 (33.8) | 4.03 ± 0.91 |
| 12. An online support community or an online therapist would be safer for people in an actual community | 45 (4.5)   | 209 (20.9) | 458 (45.8) | 228 (22.8) | 61 (6.1)   | 3.05 ± 0.93 |
| 13. Communities on social media have a therapy-like effect on people with mental illness                | 35 (3.5)   | 139 (13.9) | 407 (40.7) | 354 (35.4) | 66 (6.6)   | 3.28 ± 0.91 |
| 14. Online support groups have a meaningful impact on one's mental health                               | 14 (1.4)   | 78 (7.8)   | 306 (30.6) | 504 (50.3) | 99 (9.9)   | 3.60 ± 0.82 |
| 15. An online therapist or an online support group would be more convenient for my confidentiality      | 64 (6.4)   | 225 (22.5) | 334 (33.4) | 285 (28.5) | 93 (9.3)   | 3.12 ± 1.06 |
| 16. I would be comfortable sharing personal stories with members of an online support group             | 81 (8.1)   | 251 (25.1) | 274 (27.4) | 317 (31.7) | 78 (7.8)   | 3.06 ± 1.10 |
| 17. Online therapists can replace face-to-face interaction with therapists or counselors                | 153 (15.3) | 320 (32)   | 271 (27.1) | 210 (21)   | 47 (4.7)   | 2.68 ± 1.11 |

---
